# Supplementary material
Source: PubMed Central journal article supplement (PMC4547884)
Supplement: NIHMS714601-supplement-1.pdf [file NIHMS714601-supplement-1.pdf]

## **Supplemental Materials**

Supplemental Table 1. Odds ratios and 95% confidence intervals of progressive loss of kidney function associated with various combined age-BMI categories and with different covariates in a multivariable adjusted logistic regression model

| Age (yrs old) & BMI (kg/m <sup>2</sup> ) | Odds Ratio | 95% CI   |          | P values |
|------------------------------------------|------------|----------|----------|----------|
| <40 & <20                                | Referent   |          |          |          |
| <40 & 20-<25                             | 1.087265   | 0.954403 | 1.238623 | 0.208    |
| <40 & 25-<30                             | 1.00643    | 0.885336 | 1.144086 | 0.922    |
| <40 & 30-<35                             | 0.858884   | 0.754032 | 0.978317 | 0.022    |
| <40 & 35-<40                             | 0.782983   | 0.682471 | 0.898297 | <0.001   |
| <40 & ≥40                                | 0.755051   | 0.648815 | 0.878682 | <0.001   |
| 40-50 & <20                              | 1.218564   | 1.048719 | 1.415916 | 0.01     |
| 40-50 & 20-<25                           | 1.121134   | 0.985403 | 1.27556  | 0.082    |
| 40-50 & 25-<30                           | 1.077092   | 0.948272 | 1.223411 | 0.253    |
| 40-50 & 30-<35                           | 1.020499   | 0.897673 | 1.160132 | 0.756    |
| 40-50 & 35-<40                           | 1.080206   | 0.947207 | 1.231879 | 0.25     |
| 40-50 & ≥40                              | 1.142463   | 0.997801 | 1.308099 | 0.054    |
| 50-60 & <20                              | 1.682153   | 1.474059 | 1.919624 | <0.001   |
| 50-60 & 20-<25                           | 1.535641   | 1.352906 | 1.743059 | <0.001   |
| 50-60 & 25-<30                           | 1.375437   | 1.21228  | 1.560553 | <0.001   |
| 50-60 & 30-<35                           | 1.406703   | 1.239412 | 1.596575 | <0.001   |
| 50-60 & 35-<40                           | 1.554146   | 1.367805 | 1.765874 | <0.001   |
| 50-60 & ≥40                              | 1.850647   | 1.626941 | 2.105112 | <0.001   |
| 60-70 & <20                              | 2.355124   | 2.059743 | 2.692865 | <0.001   |
| 60-70 & 20-<25                           | 2.15025    | 1.893115 | 2.442311 | <0.001   |
| 60-70 & 25-<30                           | 1.894208   | 1.668817 | 2.150041 | <0.001   |
| 60-70 & 30-<35                           | 1.9539     | 1.720638 | 2.218784 | <0.001   |
| 60-70 & 35-<40                           | 2.212029   | 1.944771 | 2.516016 | <0.001   |
| 60-70 & ≥40                              | 2.597628   | 2.277994 | 2.962111 | <0.001   |
| 70-80 & <20                              | 3.657764   | 3.202849 | 4.177293 | <0.001   |
| 70-80 & 20-<25                           | 3.241336   | 2.85424  | 3.68093  | <0.001   |
| 70-80 & 25-<30                           | 3.054844   | 2.691039 | 3.467832 | <0.001   |
| 70-80 & 30-<35                           | 3.183594   | 2.802114 | 3.61701  | <0.001   |
| 70-80 & 35-<40                           | 3.588764   | 3.147799 | 4.091503 | <0.001   |
| 70-80 & ≥40                              | 4.203539   | 3.653364 | 4.836566 | <0.001   |
| ≥80 & <20                                | 5.633046   | 4.920996 | 6.448127 | <0.001   |
| ≥80 & 20-<25                             | 5.19336    | 4.570505 | 5.901095 | <0.001   |
| ≥80 & 25-<30                             | 5.00883    | 4.408148 | 5.691365 | <0.001   |
| ≥80 & 30-<35                             | 5.202756   | 4.562696 | 5.932603 | <0.001   |
| ≥80 & 35-<40                             | 5.908694   | 5.084299 | 6.86676  | <0.001   |
| ≥80 & ≥40                                | 7.164258   | 5.762391 | 8.907171 | <0.001   |
| Index eGFR                               | 1.026297   | 1.025948 | 1.026646 | <0.001   |
| Race (Black)                             | 1.080415   | 1.067912 | 1.093064 | <0.001   |
| Gender (male)                            | 0.956618   | 0.936059 | 0.977628 | <0.001   |
| Marital status (married)                 | 0.924881   | 0.91644  | 0.933399 | <0.001   |
| income                                   | 0.949297   | 0.944961 | 0.953652 | <0.001   |

|                           |          |          |          |        |
|---------------------------|----------|----------|----------|--------|
| CCI                       | 1.311246 | 1.305787 | 1.316727 | <0.001 |
| Cerebrovascular disease   | 0.957896 | 0.942572 | 0.97347  | <0.001 |
| CHF                       | 1.495662 | 1.470595 | 1.521156 | <0.001 |
| Peripheral artery disease | 1.063942 | 1.046711 | 1.081457 | <0.001 |
| Malignancies              | 0.660677 | 0.649531 | 0.672014 | <0.001 |
| Liver disease             | 1.27642  | 1.238446 | 1.315559 | <0.001 |
| Rheumatoid disease        | 0.818325 | 0.791184 | 0.846397 | <0.001 |
| Lung disease              | 0.832118 | 0.822624 | 0.841722 | <0.001 |
| AIDS                      | 0.282392 | 0.268031 | 0.297523 | <0.001 |
| Depression                | 0.981881 | 0.967186 | 0.9968   | 0.017  |
| Cardiovascular Disease    | 1.097745 | 1.083816 | 1.111853 | <0.001 |
| Statin use                | 0.690171 | 0.683649 | 0.696755 | <0.001 |
| ACEI use                  | 1.279338 | 1.265096 | 1.29374  | <0.001 |
| Anti-Hypertensive use     | 0.952073 | 0.937686 | 0.966682 | <0.001 |

BMI, body mass index; eGFR, estimated glomerular filtration rate, CCI, Charlson comorbidity index; CHF, congestive heart failure; AIDS, acquired immune deficiency syndrome; ACEI, angiotensin converting enzyme inhibitor

Supplemental Table 2. All-cause mortality hazard ratios and 95% confidence intervals associated with various combined age-BMI categories and with different covariates in a multivariable adjusted Cox model

| Age (yrs old) & BMI (kg/m <sup>2</sup> ) | Hazard Ratio | 95% CI    |           | P values |
|------------------------------------------|--------------|-----------|-----------|----------|
| <40 & <20                                | Referent     |           |           |          |
| <40 & 20-<25                             | 0.4956453    | 0.4259583 | 0.5767332 | <0.001   |
| <40 & 25-<30                             | 0.3943221    | 0.3402153 | 0.457034  | <0.001   |
| <40 & 30-<35                             | 0.3843465    | 0.3304757 | 0.4469988 | <0.001   |
| <40 & 35-<40                             | 0.3595268    | 0.3042643 | 0.4248264 | <0.001   |
| <40 & ≥40                                | 0.5181718    | 0.4325295 | 0.6207714 | <0.001   |
| 40-50 & <20                              | 4.092032     | 3.531785  | 4.741152  | <0.001   |
| 40-50 & 20-<25                           | 1.919526     | 1.665673  | 2.212066  | <0.001   |
| 40-50 & 25-<30                           | 1.30622      | 1.133937  | 1.504678  | <0.001   |
| 40-50 & 30-<35                           | 1.099776     | 0.953807  | 1.268084  | 0.191    |
| 40-50 & 35-<40                           | 1.163612     | 1.006313  | 1.345498  | 0.041    |
| 40-50 & ≥40                              | 1.459822     | 1.25959   | 1.691885  | <0.001   |
| 50-60 & <20                              | 7.101011     | 6.166257  | 8.177466  | <0.001   |
| 50-60 & 20-<25                           | 3.719569     | 3.232743  | 4.279709  | <0.001   |
| 50-60 & 25-<30                           | 2.309523     | 2.007274  | 2.657284  | <0.001   |
| 50-60 & 30-<35                           | 1.975118     | 1.71622   | 2.273073  | <0.001   |
| 50-60 & 35-<40                           | 2.015388     | 1.750029  | 2.320984  | <0.001   |
| 50-60 & ≥40                              | 2.43878      | 2.116497  | 2.810137  | <0.001   |
| 60-70 & <20                              | 11.26867     | 9.784628  | 12.9778   | <0.001   |
| 60-70 & 20-<25                           | 5.958667     | 5.17836   | 6.856555  | <0.001   |
| 60-70 & 25-<30                           | 3.628565     | 3.15354   | 4.175143  | <0.001   |
| 60-70 & 30-<35                           | 3.21017      | 2.789278  | 3.694573  | <0.001   |
| 60-70 & 35-<40                           | 3.416208     | 2.966205  | 3.934481  | <0.001   |
| 60-70 & ≥40                              | 4.108308     | 3.563779  | 4.736038  | <0.001   |
| 70-80 & <20                              | 17.18558     | 14.92566  | 19.78768  | <0.001   |
| 70-80 & 20-<25                           | 9.965829     | 8.661464  | 11.46662  | <0.001   |
| 70-80 & 25-<30                           | 7.058207     | 6.134498  | 8.121005  | <0.001   |
| 70-80 & 30-<35                           | 6.390967     | 5.553113  | 7.355237  | <0.001   |
| 70-80 & 35-<40                           | 6.761269     | 5.868792  | 7.789467  | <0.001   |
| 70-80 & ≥40                              | 8.079319     | 6.994789  | 9.332003  | <0.001   |
| ≥80 & <20                                | 26.33582     | 22.86535  | 30.33303  | <0.001   |
| ≥80 & 20-<25                             | 17.20987     | 14.95611  | 19.80325  | <0.001   |
| ≥80 & 25-<30                             | 13.68158     | 11.8893   | 15.74405  | <0.001   |
| ≥80 & 30-<35                             | 12.74138     | 11.06391  | 14.67319  | <0.001   |

|                           |           |           |           |        |
|---------------------------|-----------|-----------|-----------|--------|
| ≥80 & 35-<40              | 13.29938  | 11.49717  | 15.38409  | <0.001 |
| ≥80 & ≥40                 | 15.33443  | 13.01523  | 18.0669   | <0.001 |
| Index eGFR                | 1.005547  | 1.005326  | 1.005768  | <0.001 |
| Race (Black)              | 0.8214825 | 0.8150512 | 0.8279646 | <0.001 |
| Gender (male)             | 0.5548802 | 0.5442205 | 0.5657487 | <0.001 |
| Marital status (married)  | 0.856719  | 0.8520937 | 0.8613693 | <0.001 |
| income                    | 0.917636  | 0.9152596 | 0.9200186 | <0.001 |
| CCI                       | 1.302306  | 1.299464  | 1.305154  | <0.001 |
| Cerebrovascular disease   | 1.045002  | 1.036135  | 1.053946  | <0.001 |
| CHF                       | 1.564561  | 1.550446  | 1.578805  | <0.001 |
| Peripheral artery disease | 1.005963  | 0.9971093 | 1.014895  | 0.187  |
| Malignancies              | .956596   | 0.9484227 | 0.9648398 | <0.001 |
| Liver disease             | 1.675132  | 1.648976  | 1.701704  | <0.001 |
| Rheumatoid disease        | 0.8956561 | 0.8796175 | 0.9119871 | <0.001 |
| Lung disease              | 1.207707  | 1.200297  | 1.215162  | <0.001 |
| AIDS                      | 0.3004113 | 0.2906596 | 0.3104901 | <0.001 |
| Depression                | 1.107698  | 1.09725   | 1.118246  | <0.001 |
| Cardiovascular Disease    | 1.137638  | 1.129548  | 1.145785  | <0.001 |
| Statin use                | 0.5444413 | 0.5414156 | 0.5474839 | <0.001 |
| ACEI use                  | 0.8987778 | 0.8931694 | 0.9044215 | <0.001 |
| Anti-Hypertensive use     | 1.0453    | 1.036063  | 1.05462   | <0.001 |

BMI, body mass index; eGFR, estimated glomerular filtration rate, CCI, Charlson comorbidity index; CHF, congestive heart failure; AIDS, acquired immune deficiency syndrome; ACEI, angiotensin converting enzyme inhibitor

**Supplemental Figure 1.** Multivariable adjusted odds ratios (95% confidence intervals) of steeper slopes of estimated GFR vs. time (defined as slopes  $<-5$  ml/min/1.73m<sup>2</sup>/year), associated with various mean BMI-age joint categories in logistic regression models after multiple imputations. Model adjusted for gender, race, baseline eGFR, marital and income status, comorbidities, and medications except for diabetes mellitus and baseline blood pressure. Patients with BMI  $<20$  kg/m<sup>2</sup> and age  $<40$  yrs served as referent.

**Supplemental Figure 2.** Multivariable adjusted odds ratios (95% confidence intervals) of steeper slopes of estimated GFR vs. time (defined as slopes  $<-5$  ml/min/1.73m<sup>2</sup>/year), associated with various mean BMI-age joint categories in logistic regression models. Model adjusted for gender, race, baseline eGFR, marital and income status, comorbidities, and medications, and also diabetes mellitus and baseline blood pressure. Patients with BMI  $<20$  kg/m<sup>2</sup> and age  $<40$  yrs served as referent.

**Supplemental Figure 3.** Multivariable adjusted odds ratios (95% confidence intervals) of steeper slopes of estimated GFR vs. time (defined as slopes  $<-5$  ml/min/1.73m<sup>2</sup>/year), associated with various mean BMI-age joint categories in logistic regression models in patients with no hypertension at baseline. Model adjusted for gender, race, baseline eGFR, marital and income status, comorbidities, and medications except for diabetes mellitus and baseline blood pressure. Patients with BMI  $<20$  kg/m<sup>2</sup> and age  $<40$  yrs served as referent.

**Supplemental Figure 4.** Multivariable adjusted odds ratios (95% confidence intervals) of steeper slopes of estimated GFR vs. time (defined as slopes  $<-5$  ml/min/1.73m<sup>2</sup>/year), associated with various mean BMI-age joint categories in logistic regression models, in the subgroup of

patients with available urine albumin-creatinine ratio measurements. Model adjusted for gender, race, baseline eGFR, urine albumin-creatinine ratio, marital and income status, comorbidities, and medications except for diabetes mellitus and baseline blood pressure. Patients with BMI <20 kg/m<sup>2</sup> and age <40yrs served as referent.

**Supplemental Figure 5.** Multivariable adjusted odds ratios (95% confidence intervals) of steeper slopes of estimated GFR vs. time (defined as slopes <-5 ml/min/1.73m<sup>2</sup>/year), associated with various baseline BMI-age joint categories in logistic regression models. Model adjusted for gender, race, baseline eGFR, marital and income status, comorbidities, and medications except for diabetes mellitus and baseline blood pressure. Patients with BMI <20 kg/m<sup>2</sup> and age <40yrs served as referent.

**Supplemental Figure 6.** Multivariable adjusted odds ratios (95% confidence intervals) of steeper slopes of estimated GFR vs. time (defined as slopes <-5 ml/min/1.73m<sup>2</sup>/year), associated with various mean BMI categories in logistic regression models, in separate age subgroups. Model adjusted for gender, race, baseline eGFR, marital and income status, comorbidities, and medications except for diabetes mellitus and baseline blood pressure. Patients with BMI 20-<25 kg/m<sup>2</sup> served as referent.

**Supplemental Figure 7.** Multivariable adjusted hazard ratios (95% confidence intervals) of all-cause mortality associated with various mean BMI-age joint categories in Cox models after multiple imputations. Model adjusted for gender, race, baseline eGFR, marital and income status,

comorbidities, and medications except for diabetes mellitus and baseline blood pressure. Patients with BMI <20 kg/m<sup>2</sup> and age <40yrs served as referent.

**Supplemental Figure 8.** Multivariable adjusted hazard ratios (95% confidence intervals) of all-cause mortality associated with various mean BMI-age joint categories in Cox models, in the subgroup of patients with available urine albumin-creatinine ratio measurements. Model adjusted for gender, race, baseline eGFR, urine albumin-creatinine ratio, marital and income status, comorbidities, and medications except for diabetes mellitus and baseline blood pressure. Patients with BMI <20 kg/m<sup>2</sup> and age <40yrs served as referent.

**Supplemental Figure 9.** Multivariable adjusted hazard ratios (95% confidence intervals) of all-cause mortality associated with various baseline BMI-age joint categories in Cox models. Model adjusted for gender, race, baseline eGFR, marital and income status, comorbidities, and medications except for diabetes mellitus and baseline blood pressure. Patients with BMI <20 kg/m<sup>2</sup> and age <40yrs served as referent.

**Supplemental Figure 10.** Multivariable adjusted hazard ratios (95% confidence intervals) of all-cause mortality associated with various mean BMI categories in Cox models, in separate age subgroups. Model adjusted for gender, race, baseline eGFR, marital and income status, comorbidities, and medications except for diabetes mellitus and baseline blood pressure. Patients with BMI 20-<25 kg/m<sup>2</sup> served as referent.



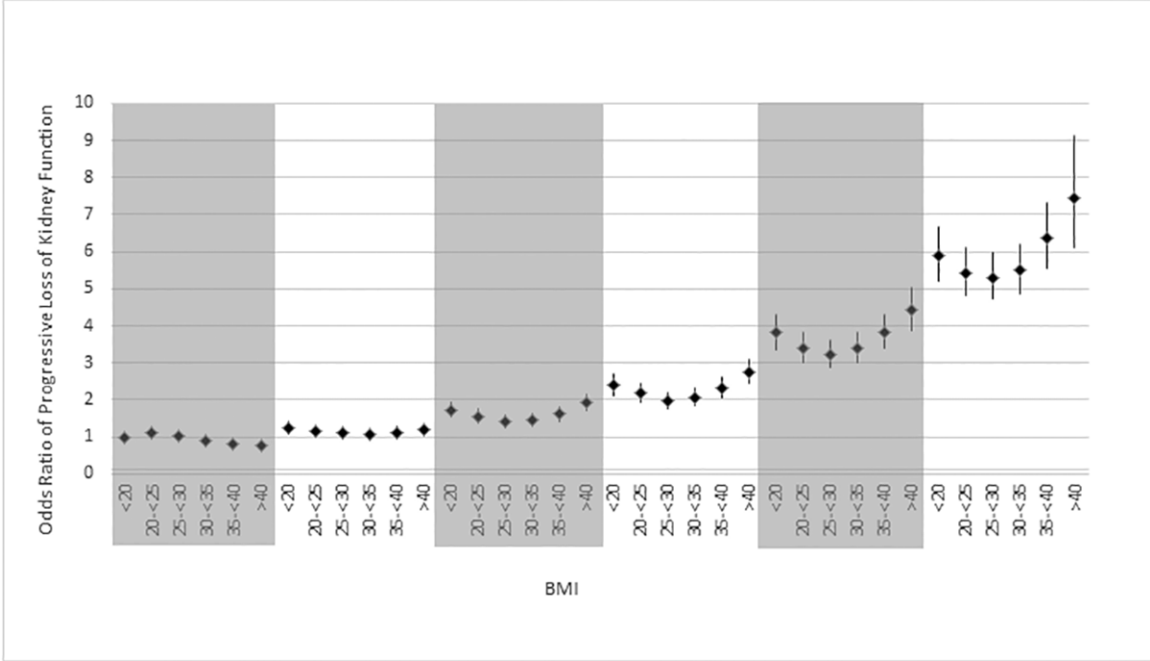

**Supplemental figure 1.** Odds ratios (95% CI) of steeper slopes associated with various mean BMI-age joint categories in logistic regression models after multiple imputations.

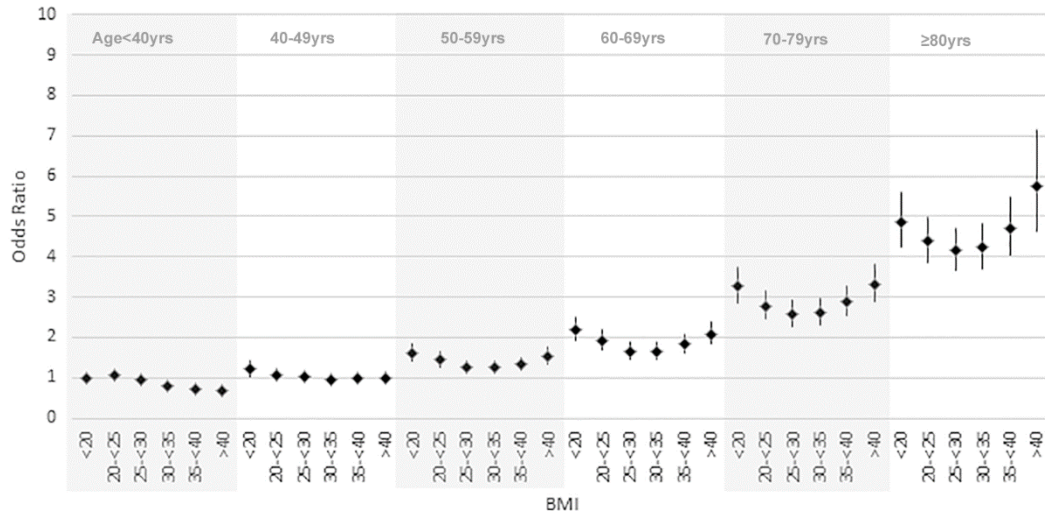

**Supplemental figure 2.** Odds ratios (95% CI) of steeper slopes associated with various mean BMI-age joint categories, adjusted for diabetes mellitus and baseline blood pressure

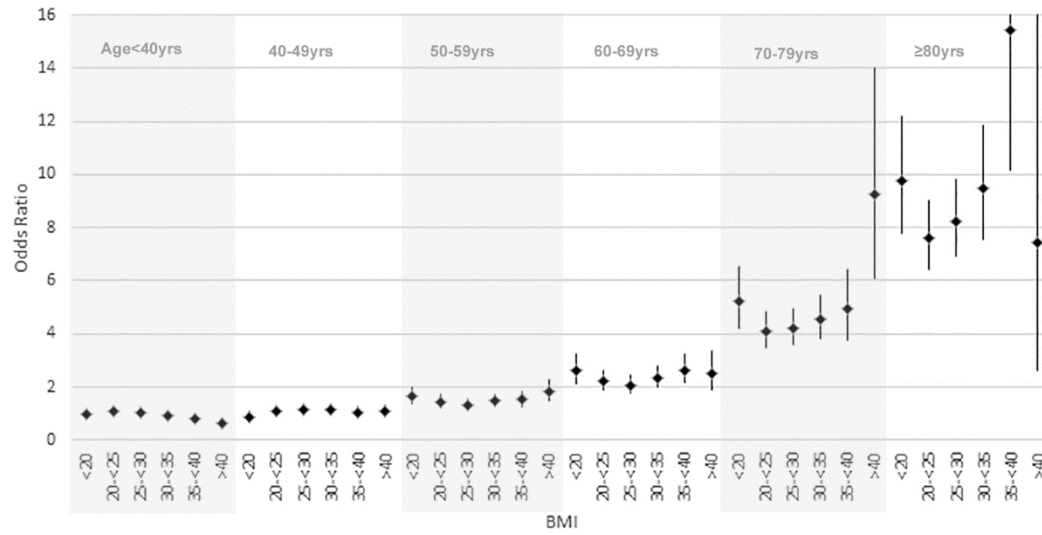

**Supplemental figure 3.** Odds ratios (95% CI) of steeper slopes associated with various mean BMI-age joint categories in patients with no hypertension at baseline

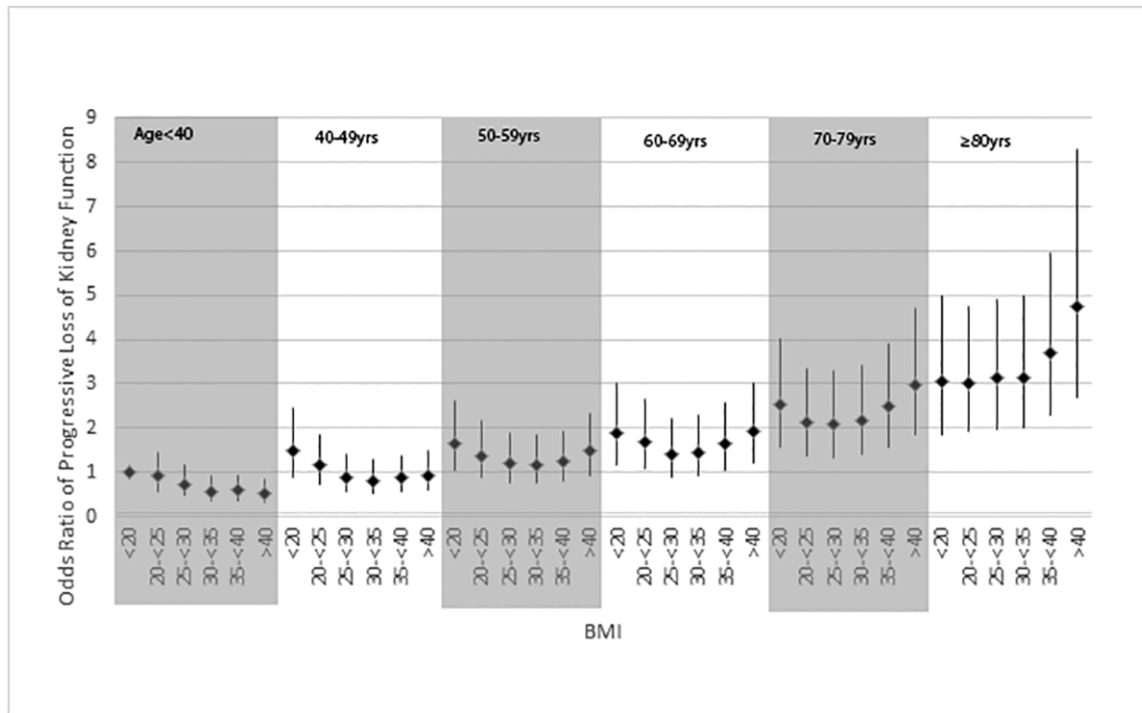

**Supplemental figure 4.** Odds ratios (95% CI) of steeper slopes associated with various mean BMI-age joint categories in the subgroup of patients with available urine albumin-creatinine ratio measurements

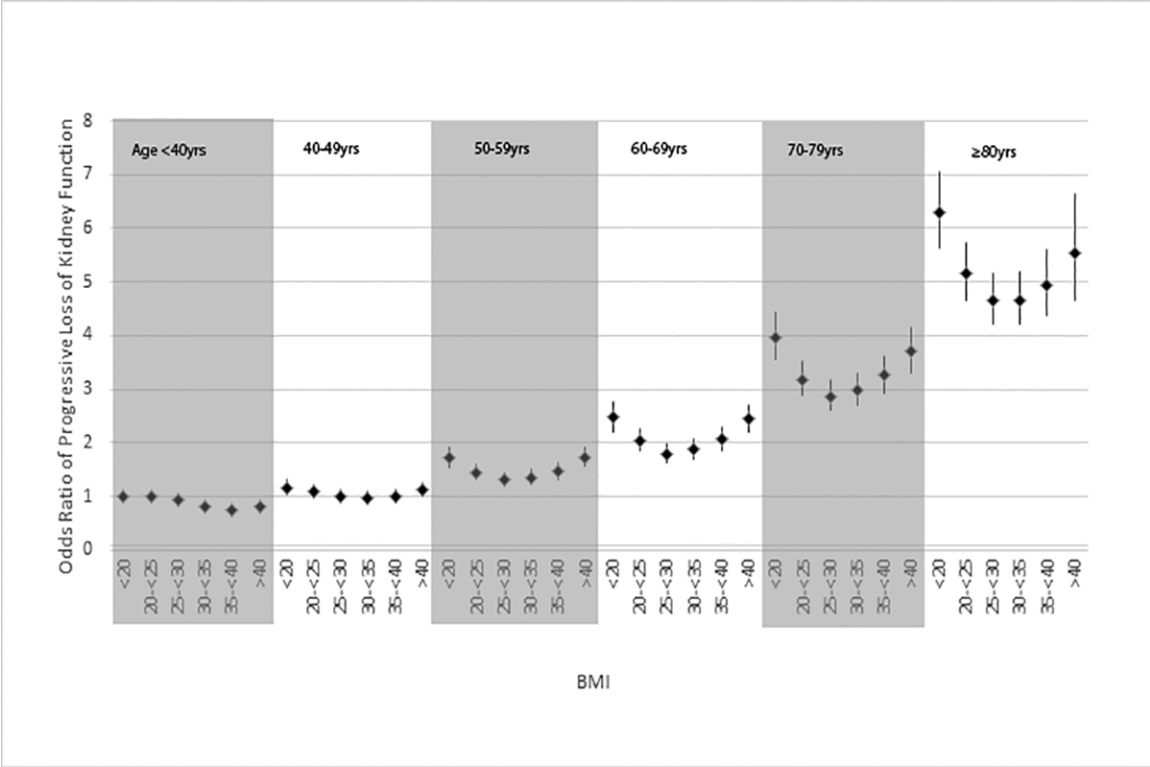

**Supplemental figure 5.** Odds ratios (95% CI) of steeper slopes associated with various baseline BMI-age joint categories

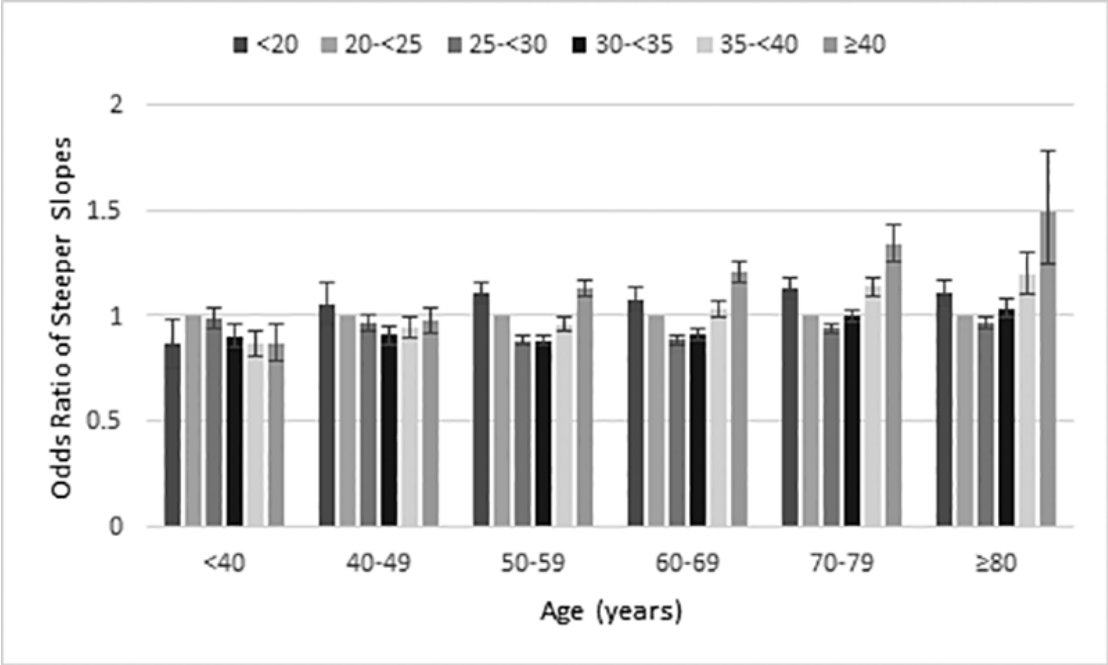

**Supplemental figure 6.** Odds ratios (95%CI) of steeper slopes associated with various mean BMI categories in separate age subgroups

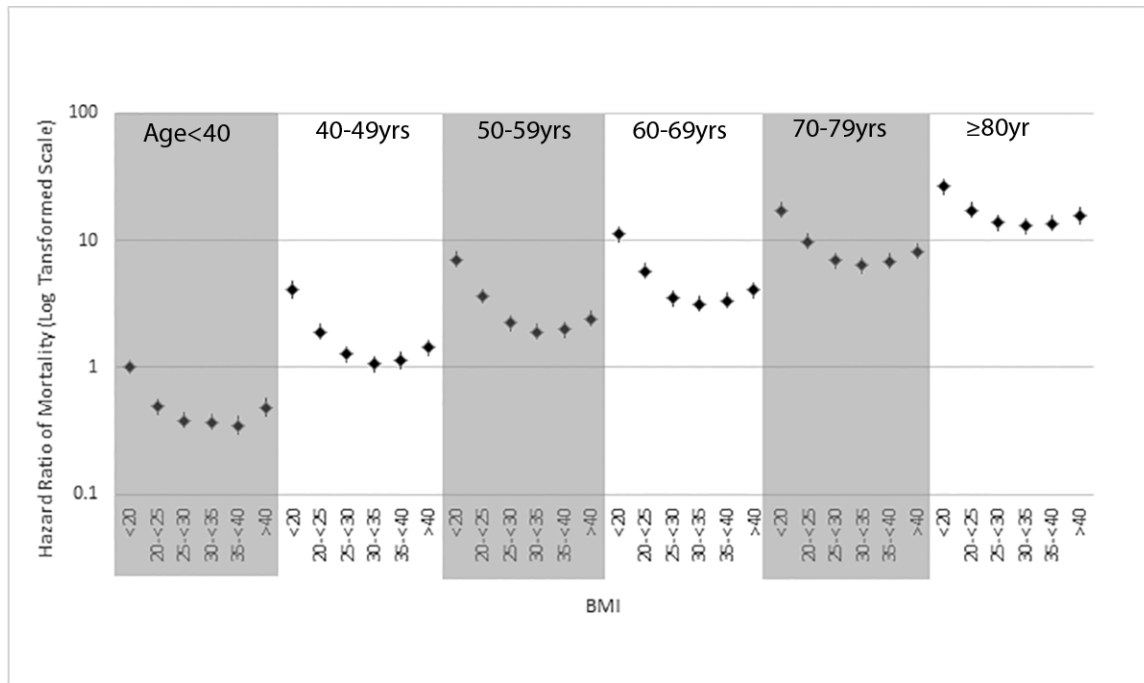

**Supplemental figure 7.** Hazard ratios (95%CI) of all-cause mortality associated with various mean BMI-age joint categories, after multiple imputations

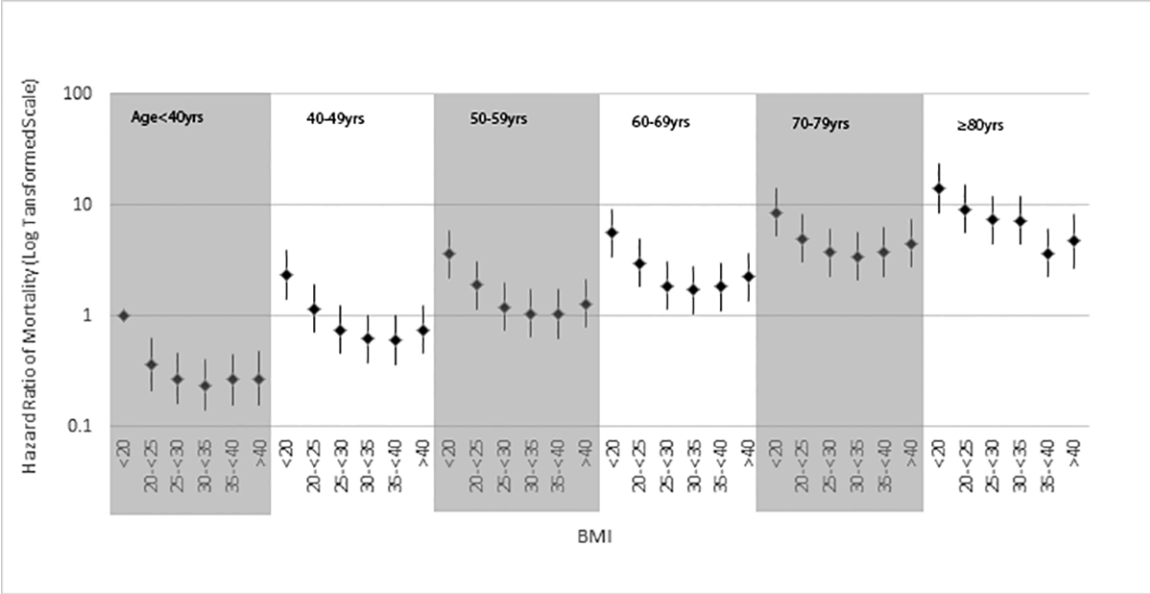

**Supplemental figure 8.** Hazard ratios (95%CI) of all-cause mortality associated with various mean BMI-age joint categories in the subgroup of patients with available urine albumin-creatinine ratio measurements



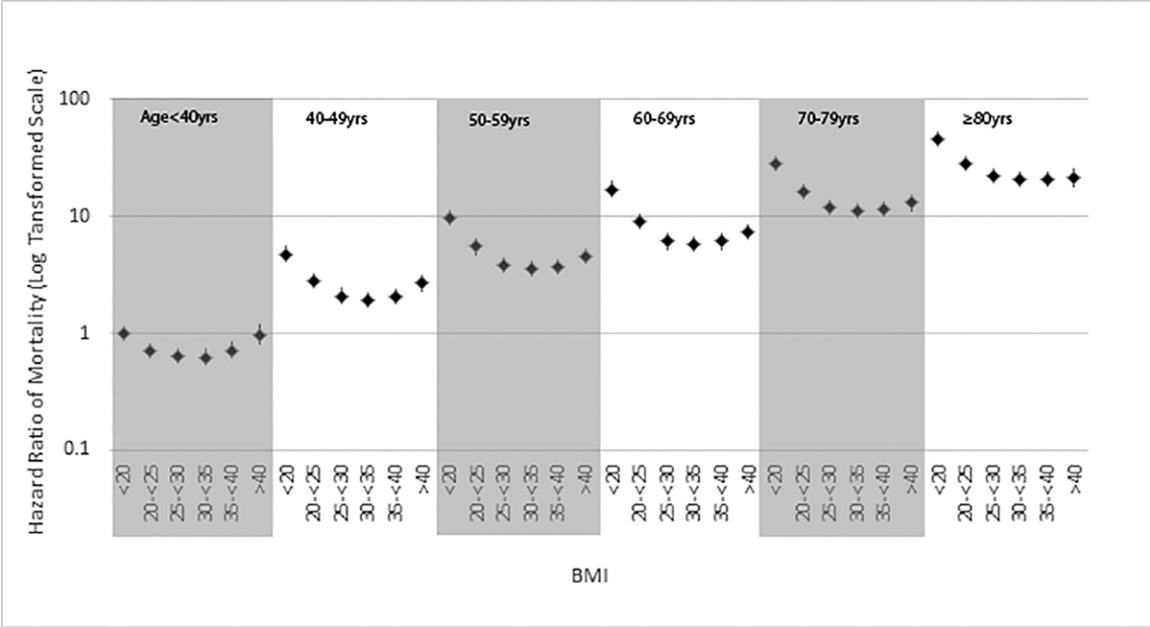

**Supplemental figure 9.** Hazard ratios (95%CI) of all-cause mortality associated with various baseline BMI-age joint categories

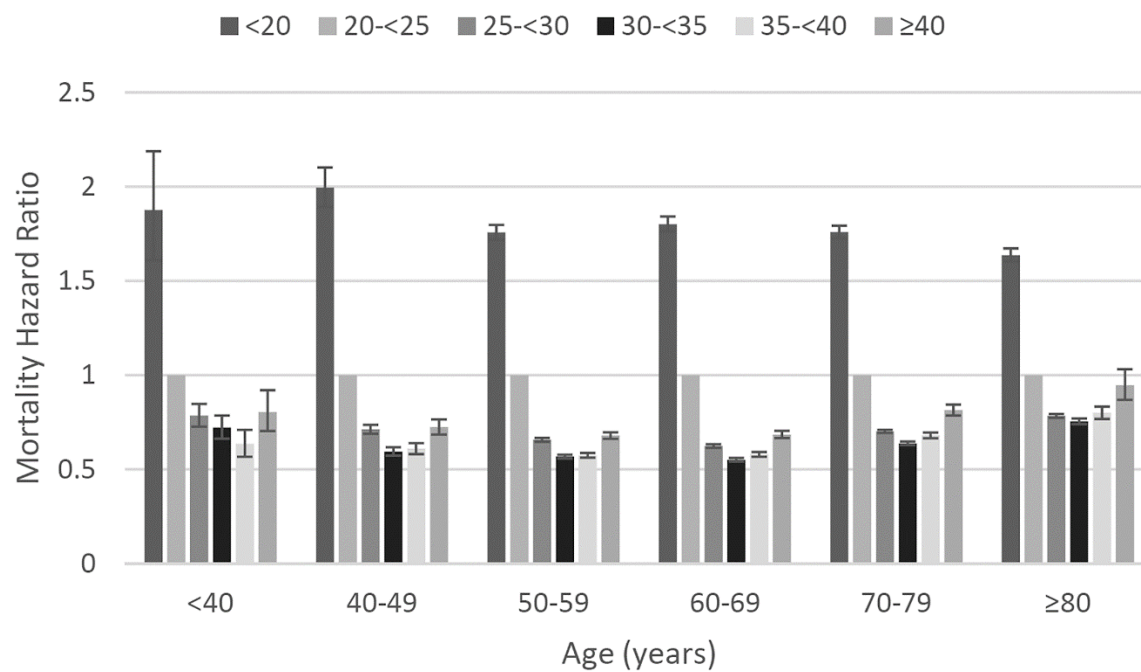

**Supplemental figure 10.** Hazard ratios (95% confidence intervals) of all-cause mortality associated with various mean BMI categories in separate age subgroups
